# Supplementary material for: Disparities in Mortality from Noncancer Causes among Adolescents and Young Adults with Cancer
Source: Oxford University Press journal article supplement (doi:10.1158/1055-9965.epi-18-1384), 2019-06-17
Supplement: 10559965epi181384-sup-214507_3_supp_5560530_psfh33.docx [file 10559965epi181384-sup-214507_3_supp_5560530_psfh33.docx]

| Supplemental Table 1. Causes of noncancer death among AYA women and men with cancer, SEER, 1985-2015 | | | | |
| --- | --- | --- | --- | --- |
|  | Women | | Men | |
|  | N | % | N | % |
| **Cardiovascular diseases** |  |  |  |  |
| Aortic Aneurysm and Dissection | 14 | 0.3% | 12 | 0.1% |
| Atherosclerosis | 8 | 0.1% | 7 | 0.1% |
| Cerebrovascular Diseases | 198 | 3.7% | 139 | 1.6% |
| Diseases of Heart | 938 | 17.3% | 1062 | 12.6% |
| Hypertension without Heart Disease | 38 | 0.7% | 34 | 0.4% |
| Other Diseases of Arteries, Arterioles, Capillaries | 20 | 0.4% | 14 | 0.2% |
| **Infectious diseases** |  |  |  |  |
| Other Infectious and Parasitic Diseases including HIV | 668 | 12.3% | 3472 | 41.1% |
| Pneumonia and Influenza | 148 | 2.7% | 170 | 2.0% |
| Septicemia | 197 | 3.6% | 144 | 1.7% |
| Tuberculosis | 4 | 0.1% | 3 | 0.0% |
| **Other noncancer causes** |  |  |  |  |
| Stomach and Duodenal Ulcers | 7 | 0.1% | 12 | 0.1% |
| Accidents and Adverse Effects | 587 | 10.8% | 737 | 8.7% |
| Alzheimers (ICD-9 and 10 only) | 3 | 0.1% | 7 | 0.1% |
| Certain Conditions Originating in Perinatal Period | 2 | 0.0% | 1 | 0.0% |
| Chronic Liver Disease and Cirrhosis | 144 | 2.7% | 203 | 2.4% |
| Chronic Obstructive Pulmonary Disease and Allied  Conditions | 139 | 2.6% | 86 | 1.0% |
| Complications of Pregnancy, Childbirth, Puerperium | 154 | 2.8% | 0 | 0.0% |
| Congenital Anomalies | 68 | 1.3% | 80 | 0.9% |
| Diabetes Mellitus | 169 | 3.1% | 129 | 1.5% |
| Homicide and Legal Intervention | 46 | 0.8% | 116 | 1.4% |
| Nephritis, Nephrotic Syndrome and Nephrosis | 119 | 2.2% | 127 | 1.5% |
| Suicide and Self-Inflicted Injury | 191 | 3.5% | 401 | 4.7% |
| Symptoms, Signs and Ill-Defined Conditions | 192 | 3.5% | 231 | 2.7% |
| Other Cause of Death | 1364 | 25.2% | 1265 | 15.0% |
