# Supplementary material for: Disparities in Mortality from Noncancer Causes among Adolescents and Young Adults with Cancer
Source: Oxford University Press journal article supplement (doi:10.1158/1055-9965.epi-18-1384), 2019-06-17
Supplement: 10559965epi181384-sup-214507_3_supp_5560532_psfh33.docx [file 10559965epi181384-sup-214507_3_supp_5560532_psfh33.docx]

| Supplemental Table 3. Cumulative incidence of cardiovascular disease deaths and infectious disease deaths among AYA men with cancer, 1985-2015 | | | | | | | | |
| --- | --- | --- | --- | --- | --- | --- | --- | --- |
|  |  | Cardiovascular disease deaths | | |  | Infectious disease deaths | | |
|  |  | Cumulative incidence | | |  | Cumulative incidence | | |
|  |  | 5-year (95% CI) | 10-year (95% CI) | 20-year (95% CI) |  | 5-year (95% CI) | 10-year (95% CI) | 20-year (95% CI) |
| **Total** |  | 0.34 (0.31, 0.37) | 0.58 (0.53, 0.62) | 1.42 (1.32, 1.52) |  | 2.22 (2.15, 2.30) | 2.48 (2.40, 2.56) | 2.84 (2.74, 2.94) |
|  |  |  |  |  |  |  |  |  |
| **Cancer type** |  |  |  |  |  |  |  |  |
| Leukemia |  | 0.52 (0.39, 0.68) | 0.85 (0.66, 1.07) | 1.59 (1.21, 2.07) |  | 1.25 (1.04, 1.48) | 1.45 (1.21, 1.71) | 2.02 (1.64, 2.47) |
| Non-Hodgkin lymphoma |  | 0.48 (0.38, 0.60) | 0.74 (0.60, 0.90) | 1.31 (1.06, 1.60) |  | 16.12 (15.55, 16.70) | 16.99 (16.40, 17.59) | 18.18 (17.51, 18.85) |
| Hodgkin lymphoma |  | 0.28 (0.20, 0.40) | 0.71 (0.55, 0.91) | 2.75 (2.28, 3.28) |  | 1.54 (1.33, 1.78) | 2.10 (1.84, 2.40) | 2.70 (2.35, 3.08) |
| Central nervous system tumors |  | 0.53 (0.40, 0.70) | 0.66 (0.50, 0.85) | 1.36 (1.04, 1.75) |  | 0.30 (0.21, 0.44) | 0.38 (0.27, 0.54) | 0.59 (0.41, 0.83) |
| Soft tissue sarcomas |  | 0.33 (0.21, 0.50) | 0.56 (0.38, 0.79) | 0.82 (0.57, 1.15) |  | 0.44 (0.30, 0.63) | 0.57 (0.40, 0.79) | 0.73 (0.50, 1.06) |
| Melanoma |  | 0.12 (0.08, 0.19) | 0.28 (0.20, 0.39) | 0.95 (0.73, 1.23) |  | 0.17 (0.11, 0.25) | 0.26 (0.19, 0.37) | 0.38 (0.27, 0.52) |
| Thyroid carcinoma |  | 0.25 (0.15, 0.39) | 0.45 (0.30, 0.66) | 1.14 (0.77, 1.65) |  | 0.07 (0.03, 0.16) | 0.13 (0.06, 0.25) | 0.37 (0.18, 0.71) |
| Head and neck carcinomas |  | 0.39 (0.24, 0.60) | 0.80 (0.57, 1.12) | 1.84 (1.36, 2.43) |  | 0.71 (0.50, 0.98) | 0.76 (0.55, 1.04) | 1.28 (0.92, 1.75) |
| Colorectal carcinomas |  | 0.38 (0.27, 0.53) | 0.66 (0.50, 0.87) | 1.30 (0.96, 1.72) |  | 1.17 (0.97, 1.41) | 1.59 (1.33, 1.88) | 2.02 (1.66, 2.42) |
| Testicular cancer |  | 0.09 (0.06, 0.14) | 0.20 (0.15, 0.27) | 0.89 (0.72, 1.10) |  | 0.20 (0.16, 0.26) | 0.32 (0.26, 0.40) | 0.51 (0.41, 0.64) |
|  |  |  |  |  |  |  |  |  |
| **Age at diagnosis** |  |  |  |  |  |  |  |  |
| 15-19 |  | 0.18 (0.12, 0.27) | 0.27 (0.18, 0.38) | 0.73 (0.51, 1.02) |  | 0.24 (0.16, 0.34) | 0.31 (0.22, 0.43) | 0.38 (0.27, 0.54) |
| 20-24 |  | 0.22 (0.16, 0.30) | 0.33 (0.25, 0.43) | 0.81 (0.62, 1.06) |  | 0.66 (0.55, 0.78) | 0.75 (0.63, 0.88) | 1.00 (0.84, 1.20) |
| 25-29 |  | 0.23 (0.18, 0.30) | 0.42 (0.34, 0.52) | 1.08 (0.89, 1.30) |  | 1.74 (1.59, 1.90) | 1.96 (1.80, 2.14) | 2.31 (2.11, 2.53) |
| 30-34 |  | 0.33 (0.27, 0.39) | 0.56 (0.48, 0.65) | 1.35 (1.17, 1.56) |  | 3.06 (2.89, 3.24) | 3.37 (3.19, 3.56) | 3.77 (3.55, 4.00) |
| 35-39 |  | 0.49 (0.43, 0.55) | 0.83 (0.75, 0.93) | 2.00 (1.81, 2.20) |  | 2.97 (2.83, 3.12) | 3.30 (3.14, 3.46) | 3.74 (3.55, 3.93) |
|  |  |  |  |  |  |  |  |  |
| **Calendar year** |  |  |  |  |  |  |  |  |
| 1985-1994 |  | 0.48 (0.40, 0.57) | 0.69 (0.60, 0.80) | 1.50 (1.35, 1.65) |  | 5.70 (5.43, 5.98) | 6.12 (5.84, 6.42) | 6.47 (6.18, 6.77) |
| 1995-2004 |  | 0.34 (0.29, 0.39) | 0.57 (0.51, 0.64) | 1.31 (1.15, 1.48) |  | 2.38 (2.25, 2.52) | 2.60 (2.46, 2.74) | 2.92 (2.76, 3.08) |
| 2005-2015 |  | 0.29 (0.25, 0.33) | 0.50 (0.43, 0.58) | -- |  | 0.79 (0.72, 0.86) | 0.89 (0.82, 0.97) |  |
|  |  |  |  |  |  |  |  |  |
| **Race/ethnicity** |  |  |  |  |  |  |  |  |
| Non-Hispanic White |  | 0.28 (0.25, 0.31) | 0.49 (0.44, 0.54) | 1.34 (1.23, 1.46) |  | 1.82 (1.73, 1.90) | 2.03 (1.94, 2.12) | 2.33 (2.22, 2.44) |
| Non-Hispanic Black |  | 0.92 (0.76, 1.10) | 1.42 (1.20, 1.66) | 2.57 (2.15, 3.04) |  | 5.77 (5.38, 6.18) | 6.44 (6.01, 6.88) | 7.42 (6.89, 7.98) |
| Hispanic |  | 0.29 (0.23, 0.37) | 0.58 (0.47, 0.71) | 1.22 (0.96, 1.53) |  | 2.56 (2.37, 2.76) | 2.81 (2.60, 3.03) | 3.23 (2.96, 3.52) |
| Other Non-Hispanic |  | 0.31 (0.22, 0.44) | 0.44 (0.32, 0.60) | 1.25 (0.91, 1.67) |  | 0.92 (0.75, 1.11) | 1.08 (0.89, 1.31) | 1.39 (1.11, 1.72) |
