# Supplementary material for: Disparities in Mortality from Noncancer Causes among Adolescents and Young Adults with Cancer
Source: Oxford University Press journal article supplement (doi:10.1158/1055-9965.epi-18-1384), 2019-06-17
Supplement: 10559965epi181384-sup-214507_3_supp_5560535_psfh33.docx [file 10559965epi181384-sup-214507_3_supp_5560535_psfh33.docx]

| Supplemental Table 6. Hazard ratios for all noncancer deaths, cardiovascular disease death, and infectious disease death according to patient characteristics among AYA men with cancer, restricted to 5-year survivors, 1985-2015 | | | | | | | | | | | | | | |
| --- | --- | --- | --- | --- | --- | --- | --- | --- | --- | --- | --- | --- | --- | --- |
|  |  |  | All noncancer deaths | | |  | Cardiovascular disease deaths | | |  | Infectious disease deaths | | |
|  | Person-years |  | Deaths | Unadjusted HR (95% CI) | Adjusted HR (95% CI) a |  | Deaths | Unadjusted HR (95% CI) | Adjusted HR (95% CI) a |  | Deaths | Unadjusted HR (95% CI) | Adjusted HR (95% CI) a |
| **Race/ethnicity** |  |  |  |  |  |  |  |  |  |  |  |  |  |
| Non-Hispanic White | 585,017 |  | 2059 | 1 | 1 |  | 566 | 1 | 1 |  | 293 | 1 | 1 |
| Non-Hispanic Black | 44,562 |  | 387 | 2.58 (2.31, 2.87) | 2.12 (1.90, 2.38) |  | 107 | 2.72 (2.21, 3.35) | 2.12 (1.72, 2.63) |  | 103 | 4.53 (3.61, 5.67) | 3.39 (2.69, 4.27) |
| Hispanic | 79,405 |  | 322 | 1.24 (1.10, 1.40) | 1.28 (1.13, 1.44 |  | 76 | 1.16 (0.92, 1.48) | 1.22 (0.96, 1.56) |  | 60 | 1.46 (1.11, 1.93) | 1.63 (1.23, 2.17) |
| Other non-Hispanic | 43,618 |  | 139 | 0.94 (0.79, 1.12) | 0.85 (0.71, 1.01) |  | 41 | 1.05 (0.77, 1.44) | 0.97 (0.70, 1.33) |  | 22 | 1.00 (0.65, 1.54) | 0.92 (0.59, 1.42) |
|  |  |  |  |  |  |  |  |  |  |  |  |  |  |
| **Geographic region** |  |  |  |  |  |  |  |  |  |  |  |  |  |
| West | 401,783 |  | 1444 | 1.11 (0.99, 1.25) | 1.14 (1.01, 1.29) |  | 348 | 0.97 (0.77, 1.22) | 1.02 (0.81, 1.29) |  | 252 | 1.12 (0.84, 1.49) | 1.16 (0.87, 1.55) |
| South | 93,810 |  | 455 | 1.56 (1.35, 1.80) | 1.47 (1.27, 1.69) |  | 120 | 1.58 (1.20, 2.07) | 1.48 (1.12, 1.95) |  | 86 | 1.58 (1.14, 2.21) | 1.42 (1.01, 2.00) |
| Northeast | 102,790 |  | 334 | 1 | 1 |  | 92 | 1 | 1 |  | 58 | 1 | 1 |
| Midwest | 131,704 |  | 584 | 1.30 (1.13, 1.48) | 1.23 (1.07, 1.41) |  | 199 | 1.50 (1.17, 1.93) | 1.47 (1.15, 1.89) |  | 73 | 1.02 (0.72, 1.44) | 0.85 (0.60, 1.20) |
|  |  |  |  |  |  |  |  |  |  |  |  |  |  |
| **% of persons below poverty b** | |  |  |  |  |  |  |  |  |  |  |  |  |
| Q1 | 382,101 |  | 1349 | 1 | 1 |  | 391 | 1 | 1 |  | 189 | 1 | 1 |
| Q2 | 162,661 |  | 647 | 1.20 (1.09, 1.32) | 1.21 (1.10, 1.33) |  | 160 | 1.09 (0.91, 1.31) | 1.10 (0.91, 1.32) |  | 129 | 1.56 (1.25, 1.96) | 1.67 (1.33, 2.10) |
| Q3 | 119,255 |  | 560 | 1.42 (1.29, 1.57) | 1.31 (1.19, 1.46) |  | 164 | 1.56 (1.29, 1.87) | 1.42 (1.17, 1.71) |  | 98 | 1.59 (1.24, 2.03) | 1.46 (1.13, 1.88) |
| Q4 | 88,289 |  | 349 | 1.28 (1.14, 1.44) | 1.25 (1.10, 1.42) |  | 75 | 1.10 (0.85, 1.41) | 1.05 (0.80, 1.36) |  | 62 | 1.36 (1.02, 1.82) | 1.48 (1.08, 2.02) |
|  |  |  |  |  |  |  |  |  |  |  |  |  |  |
| **% persons with <HS education c** | |  |  |  |  |  |  |  |  |  |  |  |  |
| Q1 | 412,837 |  | 1553 | 1 | 1 |  | 437 | 1 | 1 |  | 248 | 1 | 1 |
| Q2 | 143,237 |  | 506 | 1.07 (0.96, 1.18) | 1.10 (0.99, 1.23) |  | 127 | 1.11 (0.90, 1.36) | 1.10 (0.90, 1.36) |  | 87 | 0.94 (0.73, 1.21) | 1.15 (0.88, 1.50) |
| Q3 | 102,383 |  | 495 | 1.39 (1.25, 1.54) | 1.23 (1.11, 1.37) |  | 149 | 1.62 (1.34, 1.96) | 1.41 (1.16, 1.71) |  | 80 | 1.24 (0.96, 1.60) | 1.08 (0.83, 1.40) |
| Q4 | 93,848 |  | 351 | 1.18 (1.04, 1.33) | 1.18 (1.04, 1.35) |  | 77 | 1.13 (0.88, 1.45) | 1.10 (0.84, 1.43) |  | 63 | 1.02 (0.77, 1.35) | 1.24 (0.91, 1.69) |
|  |  |  |  |  |  |  |  |  |  |  |  |  |  |
| **Rural-urban continuum code d** | |  |  |  |  |  |  |  |  |  |  |  |  |
| Metro | 303,981 |  | 918 | 1 | 1 |  | 212 | 1 | 1 |  | 143 | 1 | 1 |
| Urban | 21,699 |  | 75 | 1.15 (0.91, 1.45) | 1.18 (0.93, 1.50) |  | 21 | 1.39 (0.89, 2.17) | 1.46 (0.93, 2.30) |  | 8 | NC | NC |
| Rural | 9,556 |  | 56 | 1.94 (1.48, 2.54) | 2.05 (1.56, 2.69) |  | 13 | 1.95 (1.12, 3.42) | 2.05 (1.16, 3.60) |  | 9 | NC | NC |
|  |  |  |  |  |  |  |  |  |  |  |  |  |  |
| NC, not calculated due to small number of deaths | | | |  |  |  |  |  |  |  |  |  |  |
| a Adjusted for race/ethnicity, calendar year; cancer type and age are stratification variables | | | | | |  |  |  |  |  |  |  |  |
| b Quartile cutpoints for AYAs diagnosed in 1985-1994: 11.15%, 15.15%, 20.45%; Quartile cutpoints for AYAs diagnosed in 1995-2004: 9.54%, 12.95%, 17.52%; Quartile cutpoints for AYAs diagnosed in 2005-2015: 11.68%, 15.58%, 19.81% | | | | | | | | | | | | | | |
| c Quartile cutpoints for AYAs diagnosed in 1985-1994: 22.77%, 28.58%, 38.07%; Quartile cutpoints for AYAs diagnosed in 1995-2004: 15.99%, 20.78%, 28.71%; Quartile cutpoints for AYAs diagnosed in 2005-2015: 10.56%, 14.41%, 20.35% | | | | | | | | | | | | | | |
| d Includes AYAs diagnosed in 1998-2015 only | | | |  |  |  |  |  |  |  |  |  |  |
