# Supplementary material for: Disparities in Mortality from Noncancer Causes among Adolescents and Young Adults with Cancer
Source: Oxford University Press journal article supplement (doi:10.1158/1055-9965.epi-18-1384), 2019-06-17
Supplement: 10559965epi181384-sup-214507_3_supp_5560536_psfh33.docx [file 10559965epi181384-sup-214507_3_supp_5560536_psfh33.docx]

| Supplemental Table 7. Hazard ratios for all noncancer deaths, cardiovascular disease death, and infectious disease death according to patient characteristics among AYA men with cancers other than Non-Hodgkin lymphoma, 1985-2015 | | | | | | | | | | | | | |
| --- | --- | --- | --- | --- | --- | --- | --- | --- | --- | --- | --- | --- | --- |
|  |  |  | All noncancer deaths | | |  | CVD death | | |  | Any infectious disease death | | |
|  | Total person-years |  | Deaths | Unadjusted HR (95% CI) | Adjusted HR (95% CI) a |  | Deaths | Unadjusted HR (95% CI) | Adjusted HR (95% CI) a |  | Deaths | Unadjusted HR (95% CI) | Adjusted HR (95% CI) a |
| **Race/ethnicity** |  |  |  |  |  |  |  |  |  |  |  |  |  |
| Non-Hispanic White | 903,333 |  | 3311 | 1 | 1 |  | 744 | 1 | 1 |  | 584 | 1 | 1 |
| Non-Hispanic Black | 73,023 |  | 853 | 3.09 (2.86, 3.33) | 2.38 (2.20, 2.57) |  | 183 | 3.22 (2.73, 3.79) | 2.37 (2.00, 2.80) |  | 296 | 5.44 (4.73, 6.26) | 3.97 (3.43, 4.59) |
| Hispanic | 150,011 |  | 728 | 1.28 (1.18, 1.39) | 1.26 (1.16, 1.37) |  | 131 | 1.18 (0.98, 1.42) | 1.20 (0.99, 1.46) |  | 164 | 1.41 (1.19, 1.68) | 1.57 (1.31, 1.88) |
| Other non-Hispanic | 73,717 |  | 287 | 1.04 (0.92, 1.17) | 0.90 (0.79, 1.01) |  | 65 | 1.13 (0.87, 1.45) | 0.98 (0.76, 1.26) |  | 54 | 1.01 (0.76, 1.34) | 0.92 (0.69, 1.22) |
|  |  |  |  |  |  |  |  |  |  |  |  |  |  |
| **Geographic region** |  |  |  |  |  |  |  |  |  |  |  |  |  |
| West | 645,009 |  | 2533 | 1.03 (0.94, 1.12) | 1.07 (0.98, 1.17) |  | 482 | 0.84 (0.70, 1.01) | 0.89 (0.73, 1.07) |  | 542 | 1.12 (0.92, 1.36) | 1.20 (0.99, 1.47) |
| South | 169,763 |  | 983 | 1.50 (1.35, 1.65) | 1.36 (1.22, 1.50) |  | 218 | 1.54 (1.25, 1.90) | 1.41 (1.14, 1.75) |  | 242 | 1.73 (1.39, 2.15) | 1.46 (1.17, 1.82) |
| Northeast | 165,616 |  | 634 | 1 | 1 |  | 147 | 1 | 1 |  | 125 | 1 | 1 |
| Midwest | 186,245 |  | 878 | 1.23 (1.11, 1.36) | 1.14 (1.03, 1.26) |  | 239 | 1.31 (1.06, 1.60) | 1.24 (1.01, 1.52) |  | 153 | 1.23 (0.97, 1.55) | 0.94 (0.74, 1.20) |
|  |  |  |  |  |  |  |  |  |  |  |  |  |  |
| **% of persons below poverty** | |  |  |  |  |  |  |  |  |  |  |  |  |
| Q1 | 557,071 |  | 2070 | 1 | 1 |  | 495 | 1 | 1 |  | 383 | 1 | 1 |
| Q2 | 273,435 |  | 1150 | 1.13 (1.05, 1.22) | 1.17 (1.09, 1.26) |  | 227 | 1.04 (0.89, 1.22) | 1.08 (0.92, 1.27) |  | 267 | 1.26 (1.08, 1.47) | 1.43 (1.22, 1.68) |
| Q3 | 218,900 |  | 1154 | 1.39 (1.29, 1.49) | 1.29 (1.20, 1.39) |  | 250 | 1.45 (1.25, 1.70) | 1.34 (1.14, 1.57) |  | 272 | 1.50 (1.28, 1.75) | 1.43 (1.22, 1.69) |
| Q4 | 150,258 |  | 803 | 1.49 (1.37, 1.62) | 1.41 (1.30, 1.54) |  | 151 | 1.38 (1.15, 1.67) | 1.34 (1.10, 1.63) |  | 176 | 1.50 (1.25, 1.79) | 1.50 (1.24, 1.82) |
|  |  |  |  |  |  |  |  |  |  |  |  |  |  |
| **% persons with <HS education** | |  |  |  |  |  |  |  |  |  |  |  |  |
| Q1 | 581,538 |  | 2276 | 1 | 1 |  | 536 | 1 | 1 |  | 477 | 1 | 1 |
| Q2 | 252,910 |  | 1039 | 1.07 (0.99, 1.15) | 1.12 (1.04, 1.21) |  | 204 | 1.08 (0.92, 1.28) | 1.12 (0.95, 1.34) |  | 218 | 0.87 (0.74, 1.02) | 1.04 (0.88, 1.24) |
| Q3 | 180,340 |  | 979 | 1.37 (1.27, 1.48) | 1.23 (1.14, 1.33) |  | 220 | 1.53 (1.30, 1.79) | 1.35 (1.15, 1.60) |  | 218 | 1.20 (1.02, 1.42) | 1.09 (0.92, 1.29) |
| Q4 | 184,876 |  | 883 | 1.22 (1.13, 1.32) | 1.25 (1.15, 1.37) |  | 163 | 1.24 (1.03, 1.49) | 1.28 (1.05, 1.57) |  | 185 | 0.93 (0.78, 1.10) | 1.12 (0.92, 1.36) |
|  |  |  |  |  |  |  |  |  |  |  |  |  |  |
| **Rural-urban continuum code b** | |  |  |  |  |  |  |  |  |  |  |  |  |
| Metro | 618,108 |  | 2356 | 1 | 1 |  | 421 | 1 | 1 |  | 496 | 1 | 1 |
| Urban | 43,895 |  | 201 | 1.21 (1.04, 1.39) | 1.25 (1.08, 1.45) |  | 45 | 1.51 (1.11, 2.05) | 1.58 (1.16, 2.15) |  | 33 | 0.94 (0.66, 1.34) | 1.04 (0.73, 1.49) |
| Rural | 19,943 |  | 125 | 1.64 (1.37, 1.96) | 1.76 (1.47, 2.11) |  | 27 | 1.99 (1.35, 2.93) | 2.12 (1.43, 3.14) |  | 21 | 1.31 (0.84, 2.02) | 1.61 (1.04, 2.51) |
|  |  |  |  |  |  |  |  |  |  |  |  |  |  |
|  |  |  |  |  |  |  |  |  |  |  |  |  |  |
| a Adjusted for race/ethnicity, calendar year; cancer type and age are stratification variables | | | | | | | | | | | | | |
| b Includes AYAs diagnosed in 1998-2015 only | | | | | | | | | | | | | |
